# Supplementary material for: Synthesis, crystal structures and magnetic properties of a P-stereogenic ortho-(4-amino-tempo)phosphinic amide radical and its CuII complex
Source: Royal Society of Chemistry journal article supplement (doi:10.1039/d0dt04298f), 2021-01-01
Supplement: d0dt04298f1.pdf [file d0dt04298f1.pdf]

## Supporting Information

### Synthesis, Crystal Structure and Magnetic Properties of a P-Stereogenic Ortho-(4-amino-tempo)Phosphinic Amide Radical and its Cu<sup>II</sup> Complex

Yolanda Navarro,<sup>a</sup> Guilherme P. Guedes,<sup>b</sup> Miguel A. del Águila-Sánchez,<sup>a</sup> María José Iglesias,<sup>a</sup> Francisco Lloret<sup>c</sup> and Fernando López-Ortiz<sup>a</sup>

<sup>a</sup>Área de Química Orgánica, Centro de Investigación CIAIMBITAL, Universidad de Almería, Carretera de Sacramento s/n, 04120 Almería, Spain.

<sup>b</sup>Universidade Federal Fluminense, Instituto de Química, Departamento de Química Inorgânica, Outeiro de São João Batista, s/n, Niterói, Rio de Janeiro, Brazil.

<sup>c</sup>Instituto de Ciencia Molecular (ICMol) / Departamento de Química Inorgánica, Universidad de Valencia, C/ Catedrático José Beltrán, 2, 46980 Paterna, Valencia, Spain.

#### Contents.

|                                                                                                                                   |     |
|-----------------------------------------------------------------------------------------------------------------------------------|-----|
| <b>Figure S1:</b> <sup>1</sup> H NMR spectrum of compound <b>10</b> .....                                                         | S3  |
| <b>Figure S2:</b> <sup>31</sup> P{ <sup>1</sup> H} NMR spectrum of compound <b>10</b> .....                                       | S3  |
| <b>Figure S3:</b> <sup>1</sup> H NMR spectrum in the presence of PhNHNH <sub>2</sub> of compound <b>10</b> .....                  | S4  |
| <b>Figure S4:</b> <sup>31</sup> P{ <sup>1</sup> H} NMR spectrum in the presence of PhNHNH <sub>2</sub> of compound <b>10</b> .... | S4  |
| <b>Figure S5:</b> <sup>1</sup> H and <sup>1</sup> H{ <sup>31</sup> P} NMR spectra of compound <b>11</b> .....                     | S5  |
| <b>Figure S6:</b> <sup>31</sup> P{ <sup>1</sup> H} NMR spectrum of compound <b>11</b> .....                                       | S5  |
| <b>Figure S7:</b> DEPT-135 and <sup>13</sup> C{ <sup>1</sup> H} NMR spectra of compound <b>11</b> .....                           | S6  |
| <b>Figure S8:</b> <sup>1</sup> H NMR spectrum of compound <b>13</b> .....                                                         | S6  |
| <b>Figure S9:</b> <sup>31</sup> P{ <sup>1</sup> H} NMR spectrum of compound <b>13</b> .....                                       | S7  |
| <b>Figure S10:</b> <sup>1</sup> H NMR spectrum in the presence of PhNHNH <sub>2</sub> of compound <b>13</b> .....                 | S7  |
| <b>Figure S11:</b> <sup>31</sup> P{ <sup>1</sup> H} NMR spectrum in the presence of PhNHNH <sub>2</sub> of compound <b>13</b> ..  | S8  |
| <b>Figure S12:</b> <sup>1</sup> H and <sup>1</sup> H{ <sup>31</sup> P} NMR spectra of compound <b>14</b> .....                    | S8  |
| <b>Figure S13:</b> <sup>31</sup> P{ <sup>1</sup> H} NMR spectrum of compound <b>14</b> .....                                      | S9  |
| <b>Figure S14:</b> DEPT-135 and <sup>13</sup> C{ <sup>1</sup> H} NMR spectra of compound <b>14</b> .....                          | S9  |
| <b>Figure S15:</b> <sup>1</sup> H NMR spectrum of compound <b>15</b> .....                                                        | S10 |
| <b>Figure S16:</b> <sup>31</sup> P{ <sup>1</sup> H} NMR spectrum of compound <b>15</b> .....                                      | S10 |
| <b>Figure S17:</b> <sup>1</sup> H and <sup>1</sup> H{ <sup>31</sup> P} NMR spectra of compound <b>16</b> .....                    | S11 |
| <b>Figure S18:</b> <sup>31</sup> P{ <sup>1</sup> H} NMR spectrum of compound <b>16</b> .....                                      | S11 |

|                                                                                                                                                                     |     |
|---------------------------------------------------------------------------------------------------------------------------------------------------------------------|-----|
| <b>Figure S19:</b> $^1\text{H}$ and $^1\text{H}\{^{31}\text{P}\}$ NMR spectra of compound <b>17</b> .....                                                           | S12 |
| <b>Figure S20:</b> $^{31}\text{P}\{^1\text{H}\}$ NMR spectrum of compound <b>17</b> .....                                                                           | S12 |
| <b>Figure S21:</b> DEPT-135 and $^{13}\text{C}$ NMR spectra of compound <b>17</b> .....                                                                             | S13 |
| <b>Figure S22:</b> $^1\text{H}$ NMR spectrum of compound <b>18</b> .....                                                                                            | S13 |
| <b>Figure S23:</b> $^{31}\text{P}\{^1\text{H}\}$ NMR spectrum of compound <b>18</b> .....                                                                           | S14 |
| <b>Table S1:</b> Summary of the crystal structure, data collection and refinement parameters for <b>10</b> and <b>19</b> .....                                      | S15 |
| <b>Figure S20:</b> Thermal ellipsoids of the asymmetric unit of compound <b>10</b> drawn at 50% of probability level. Hydrogen atoms were omitted for clarity. .... | S16 |
| <b>Figure S21:</b> Thermal ellipsoids of the asymmetric unit of compound <b>19</b> drawn at 50% of probability level. Hydrogen atoms were omitted for clarity. .... | S16 |

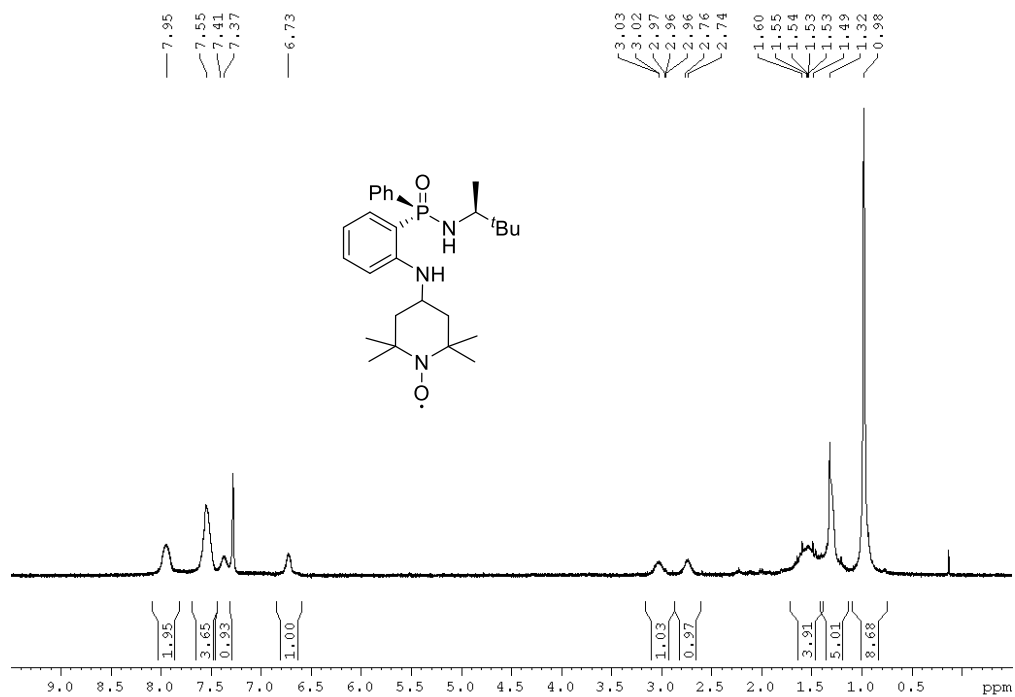

**Figure S1.** <sup>1</sup>H NMR spectrum (300.13 MHz) of compound 10.

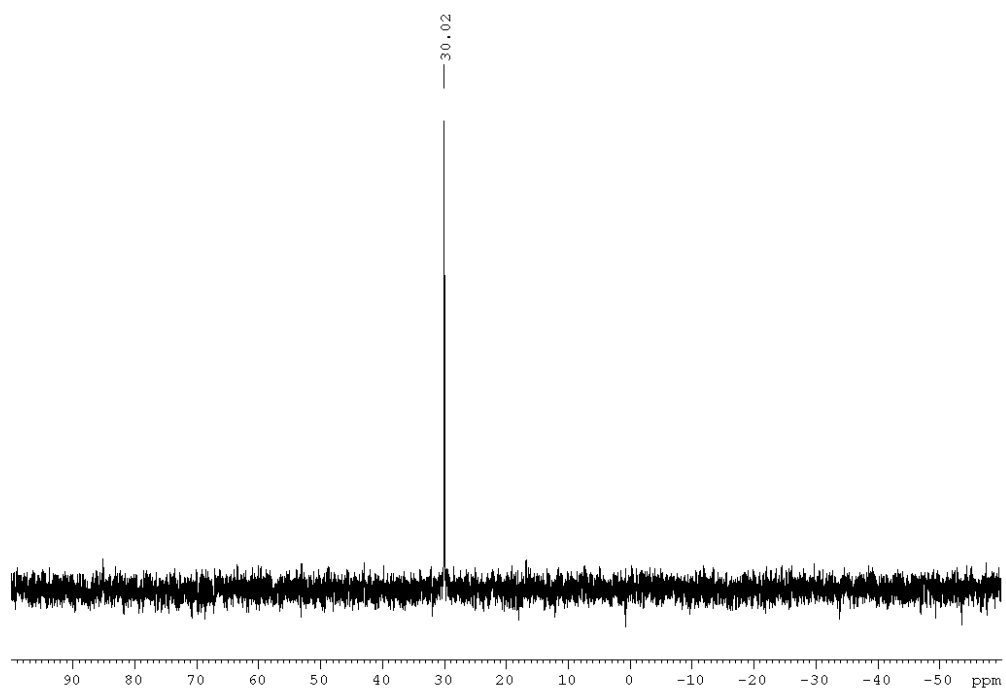

**Figure S2.** <sup>31</sup>P{<sup>1</sup>H} NMR spectrum (121.50 MHz) of compound 10.

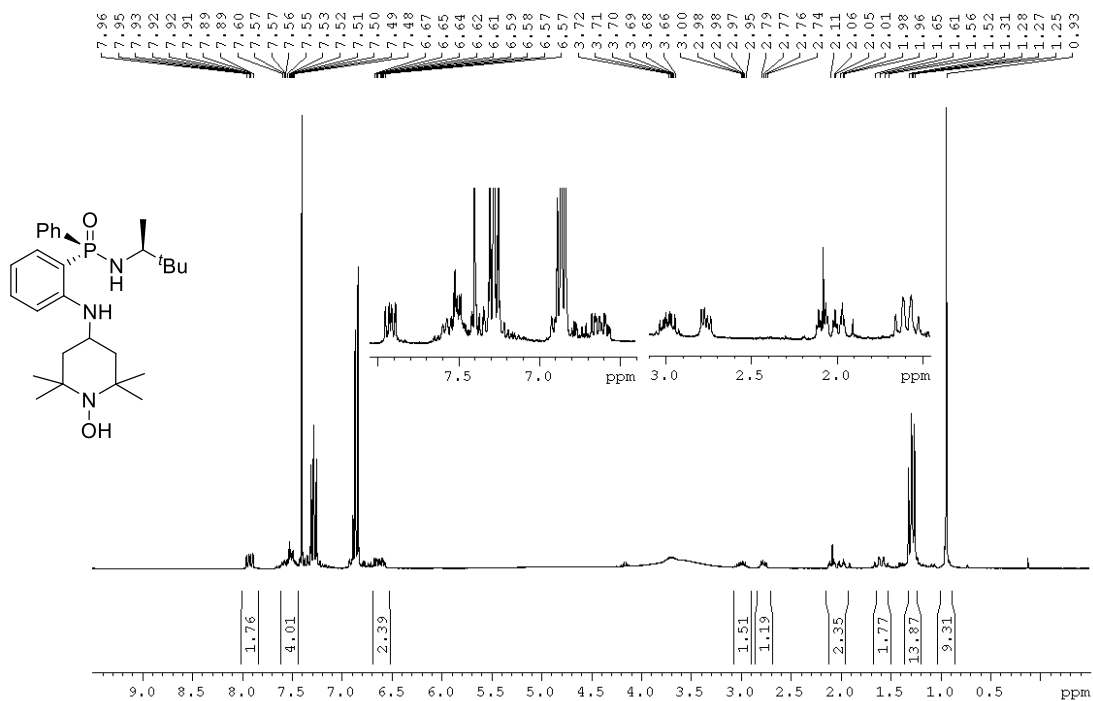

**Figure S3.** <sup>1</sup>H NMR spectrum (300.13 MHz) in the presence of PhNHNH<sub>2</sub> of compound 10.

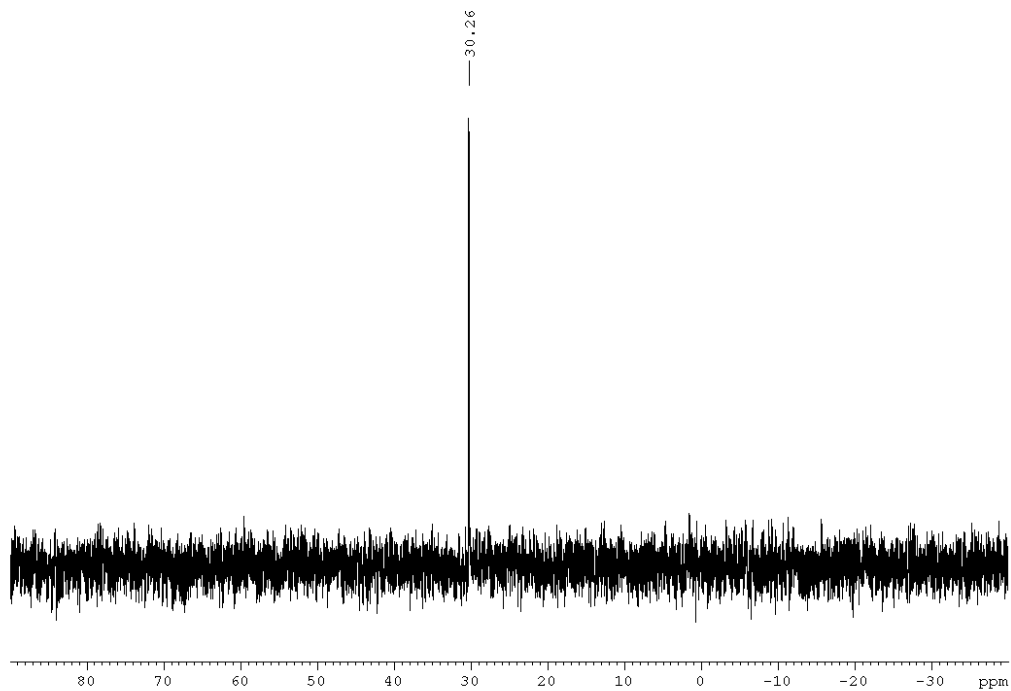

**Figure S4.** <sup>31</sup>P{<sup>1</sup>H} NMR spectrum (121.50 MHz) in the presence of PhNHNH<sub>2</sub> of compound 10.

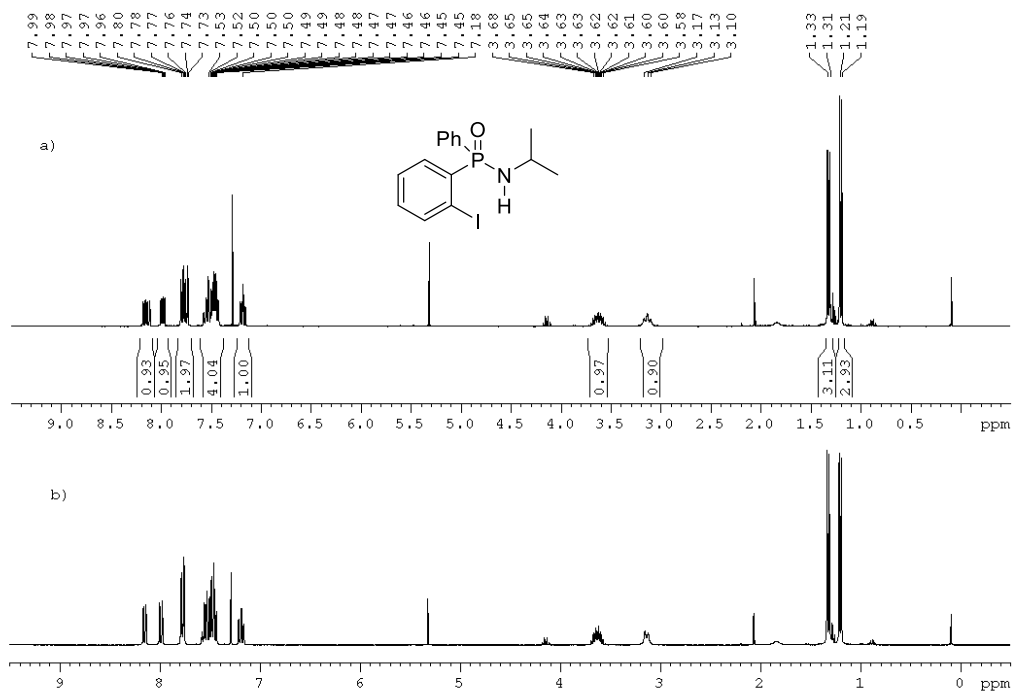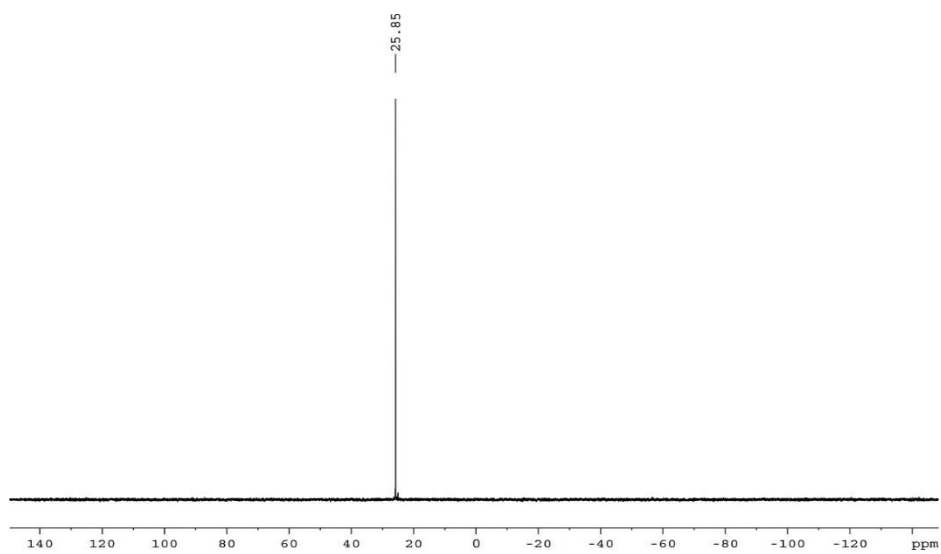

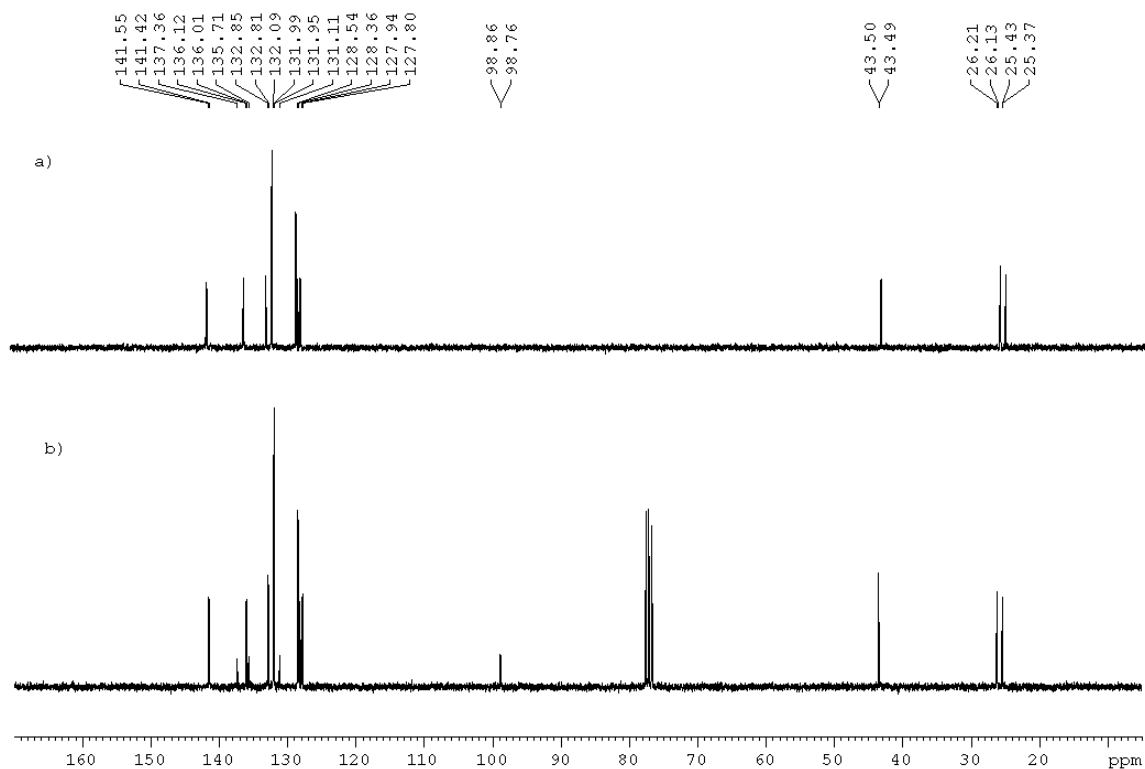

**Figure S7.** DEPT-135 (a) and  $^{13}\text{C}\{^1\text{H}\}$  (b) NMR spectra (75.47 MHz) of compound **11**.

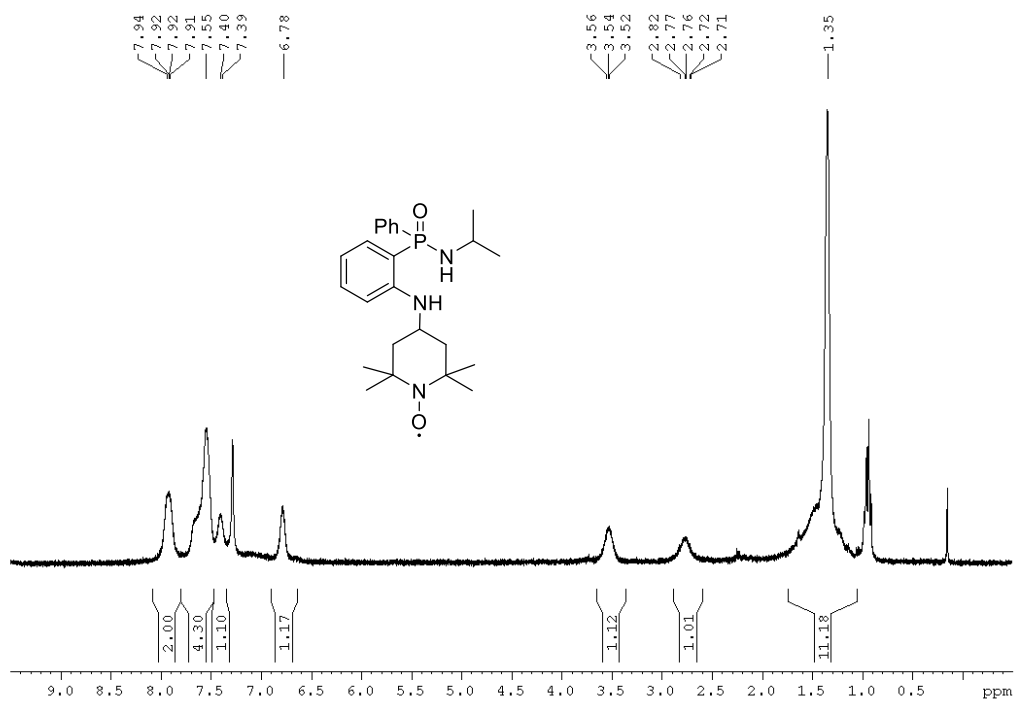

**Figure S8.**  $^1\text{H}$  NMR spectrum (300.13 MHz) of compound **13**.



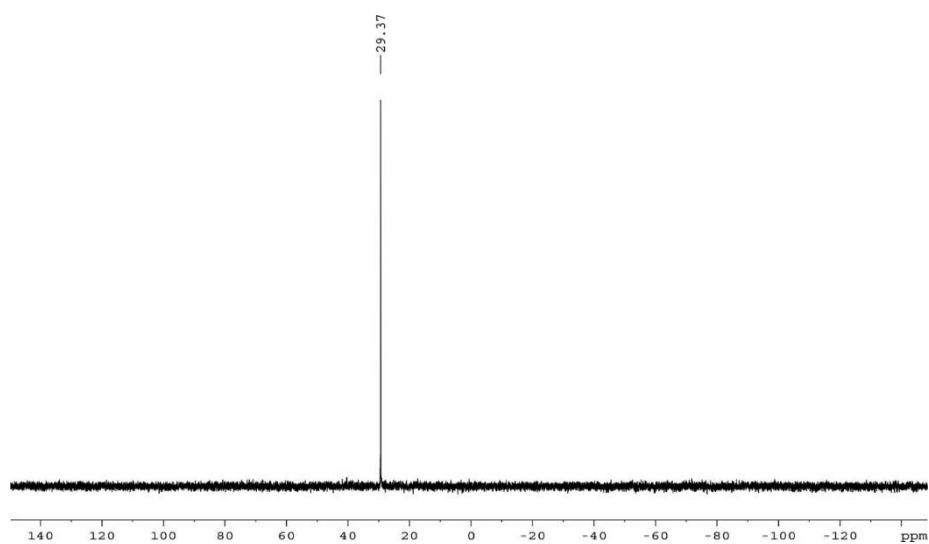

**Figure S11.**  $^{31}\text{P}\{^1\text{H}\}$  NMR spectrum (121.50 MHz) in the presence of PhNHNH<sub>2</sub> of compound **13**.

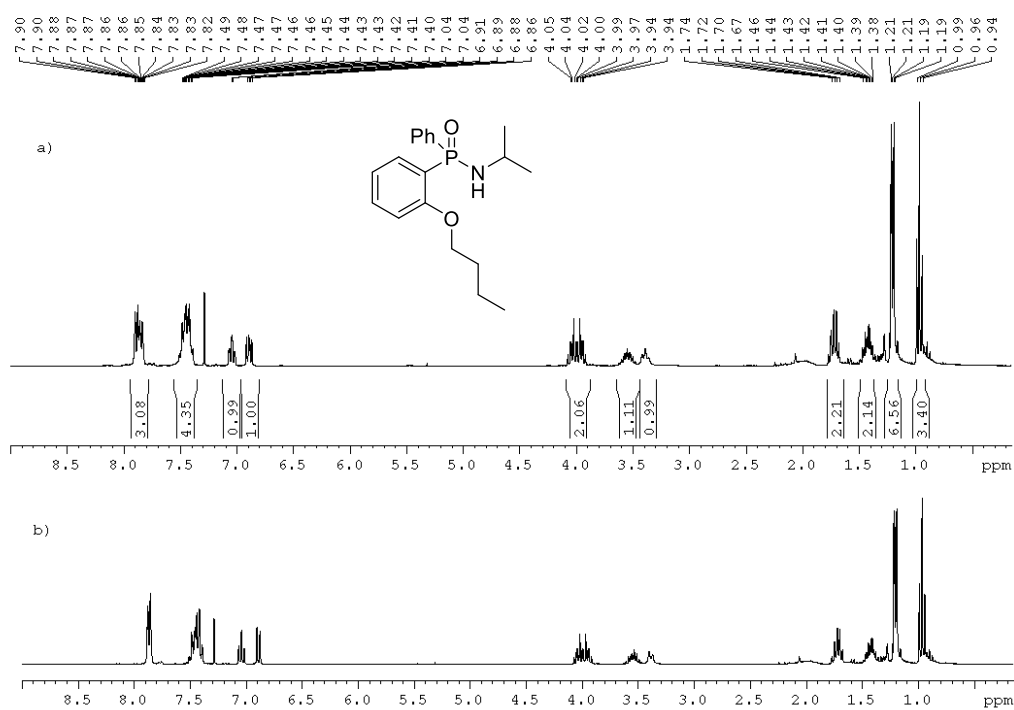

**Figure S12.**  $^1\text{H}$  (a) and  $^1\text{H}\{^{31}\text{P}\}$  (b) NMR spectra (300.13 MHz) of compound **14**.



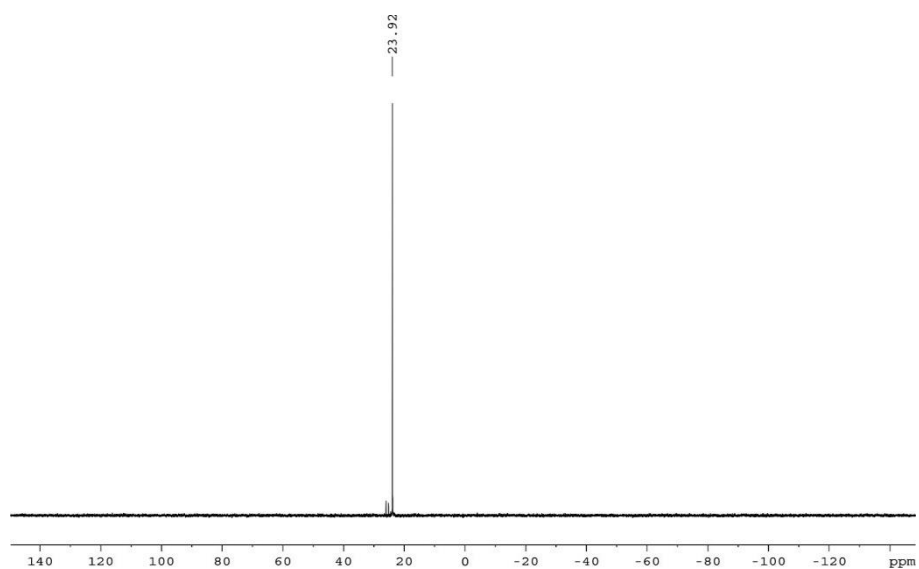

**Figure S13.**  $^{31}\text{P}\{^1\text{H}\}$  NMR spectrum (121.50 MHz) of compound **14**.

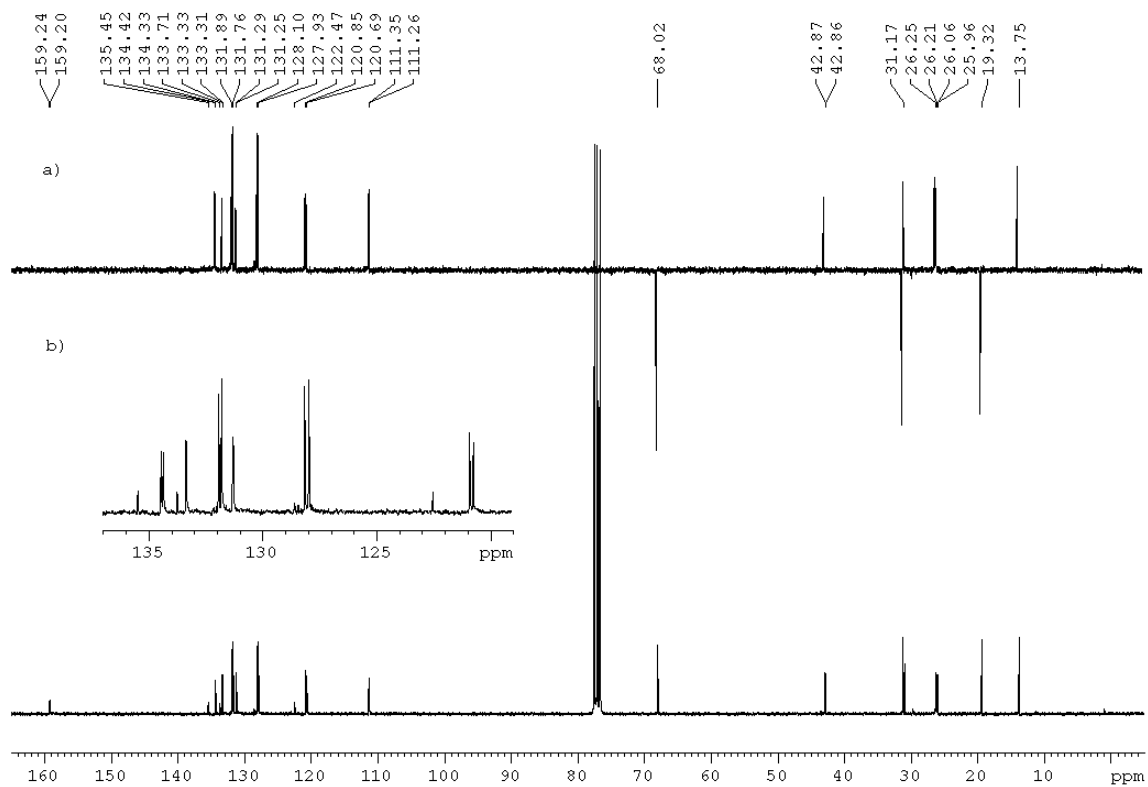

**Figure S14.** DEPT-135 (a) and  $^{13}\text{C}\{^1\text{H}\}$  (b) NMR spectra (75.47 MHz) of compound **14**.

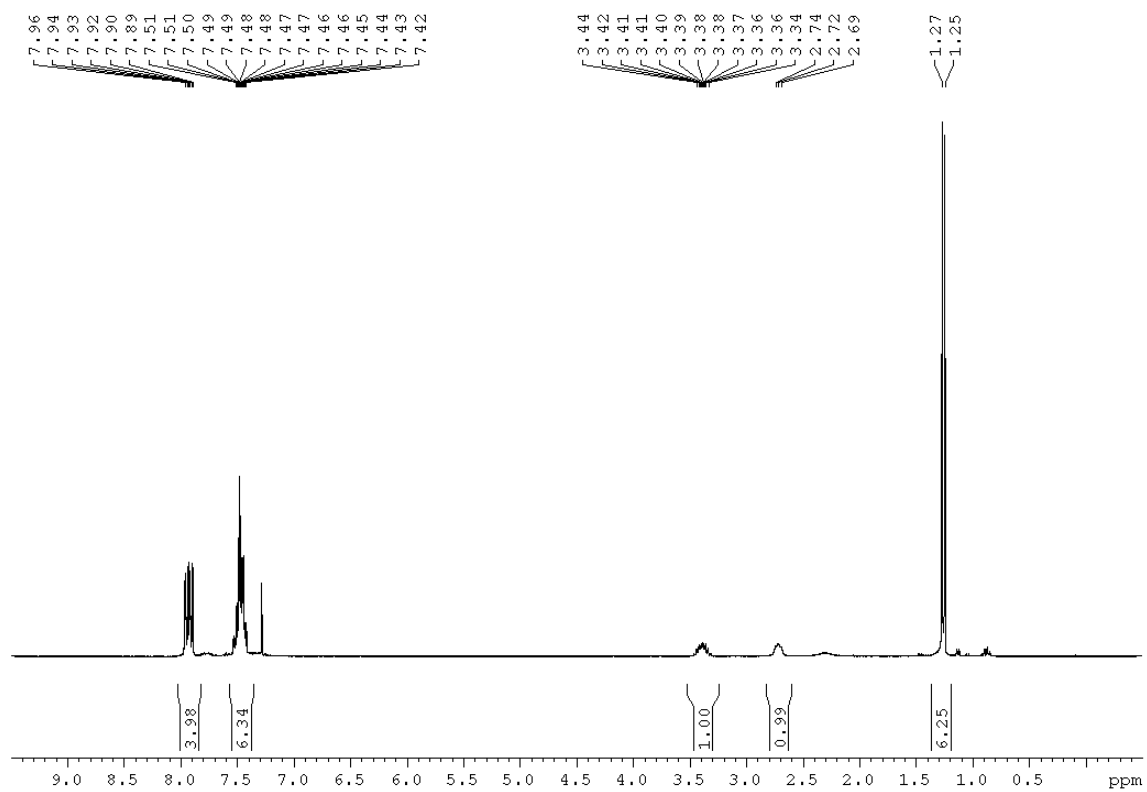

**Figure S15.**  $^1\text{H}$  NMR spectrum (300.13 MHz) of compound **15**.

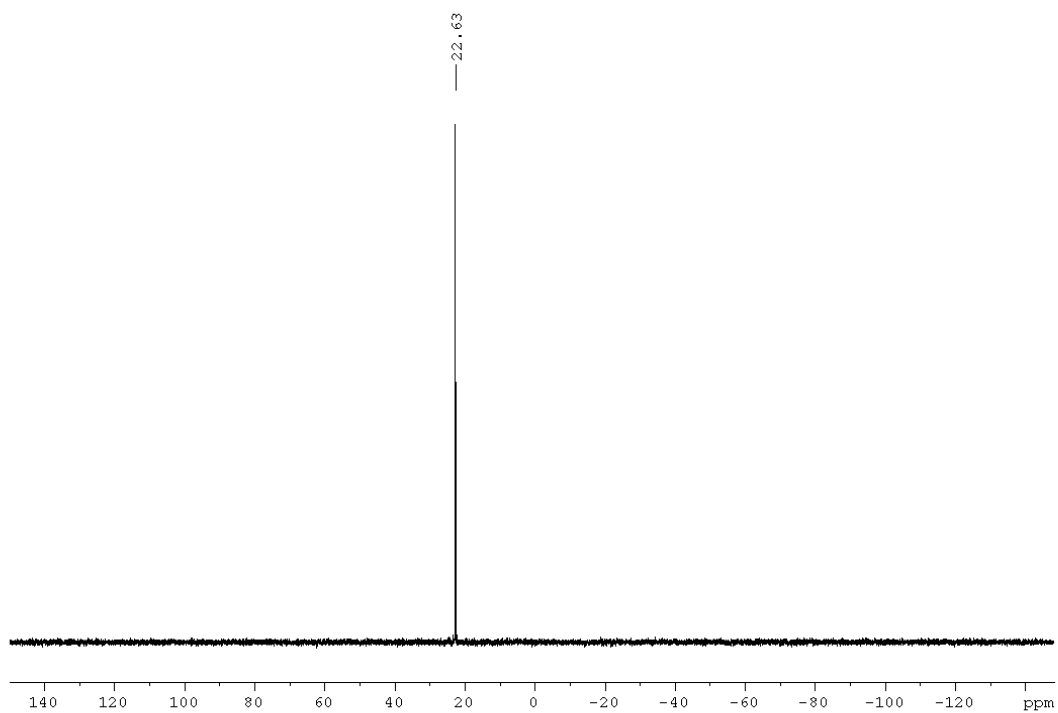

**Figure S16.**  $^{31}\text{P}\{^1\text{H}\}$  NMR spectrum (121.50 MHz) of compound **15**.

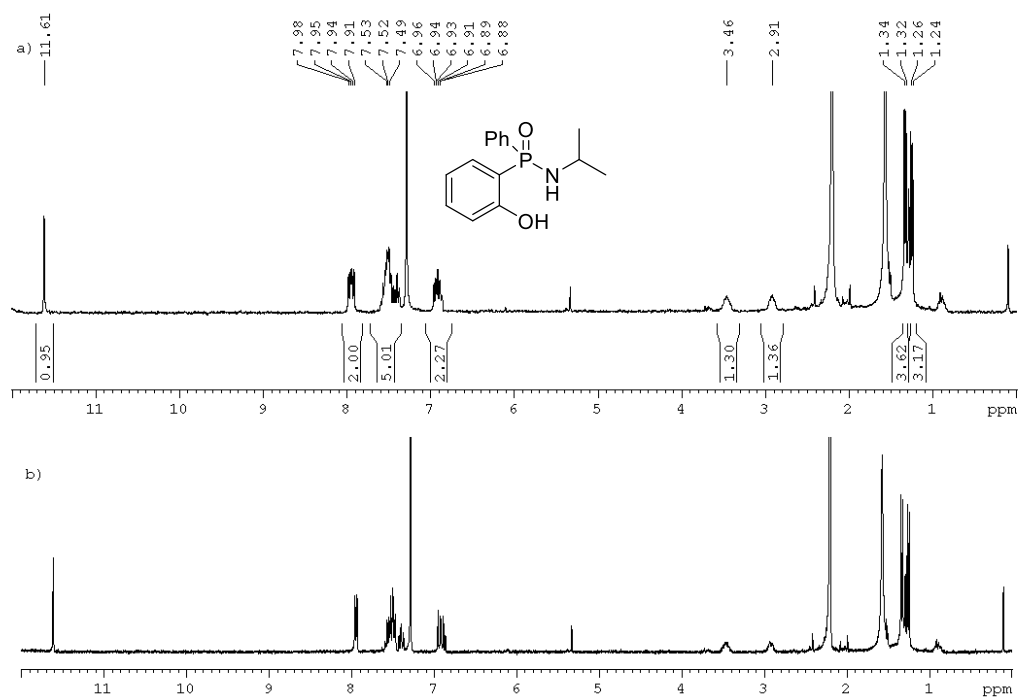

**Figure S17.**  $^1\text{H}$  (a) and  $^1\text{H}\{^{31}\text{P}\}$  (b) NMR spectra (300.13 MHz) of compound 16.

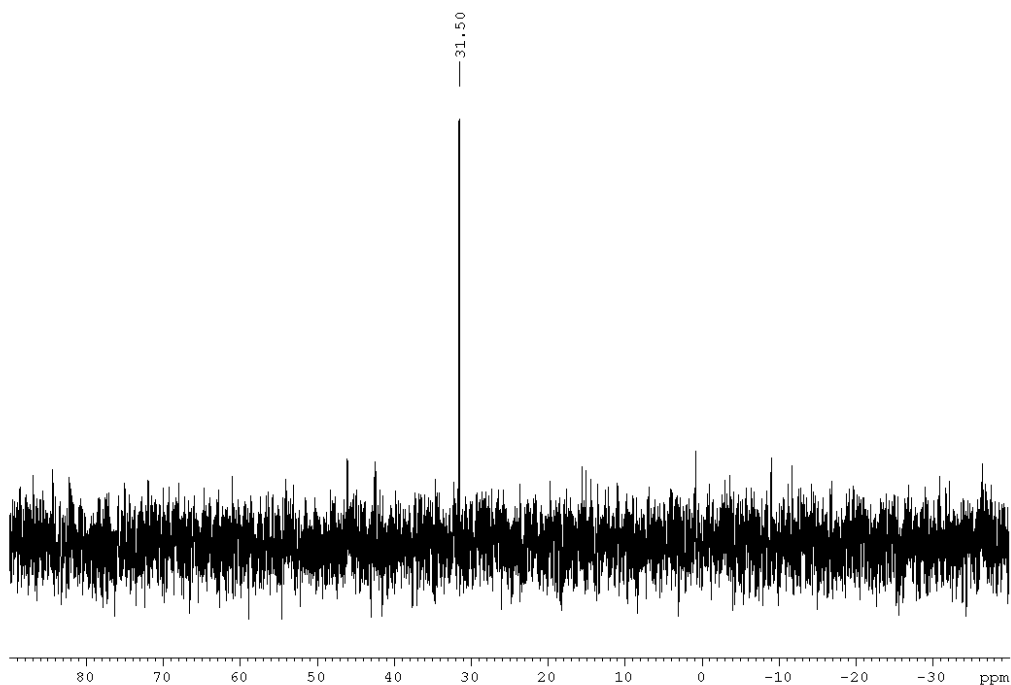

**Figure S18.**  $^{31}\text{P}\{^1\text{H}\}$  NMR spectrum (121.50 MHz) of compound 16.

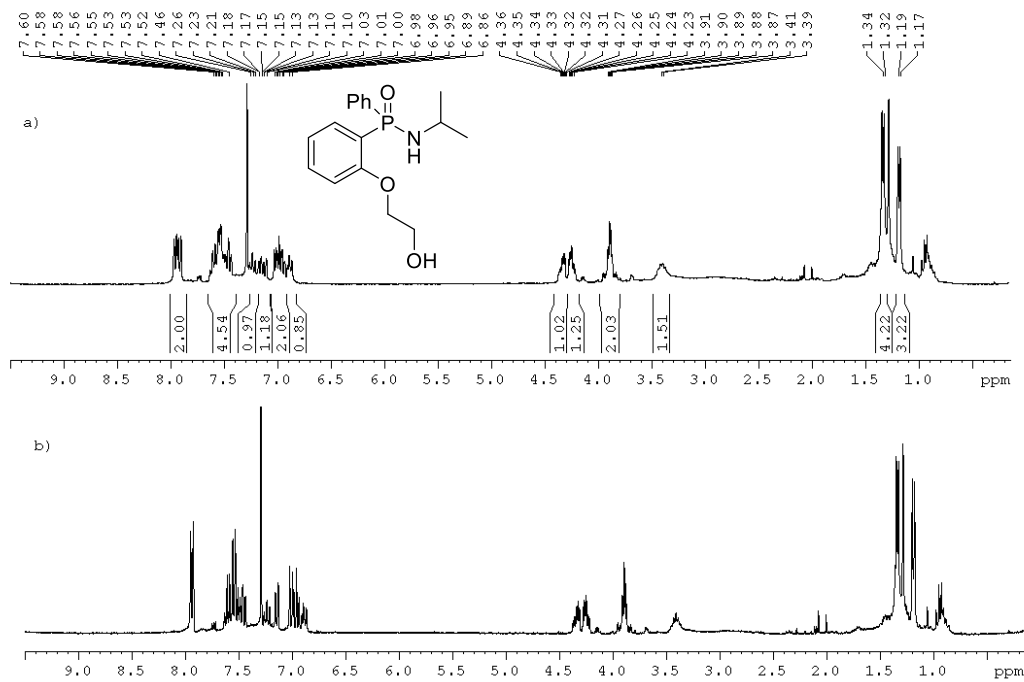

**Figure S19.**  $^1\text{H}$  (a) and  $^1\text{H}\{^{31}\text{P}\}$  (b) NMR spectra (300.13 MHz) of compound 17.

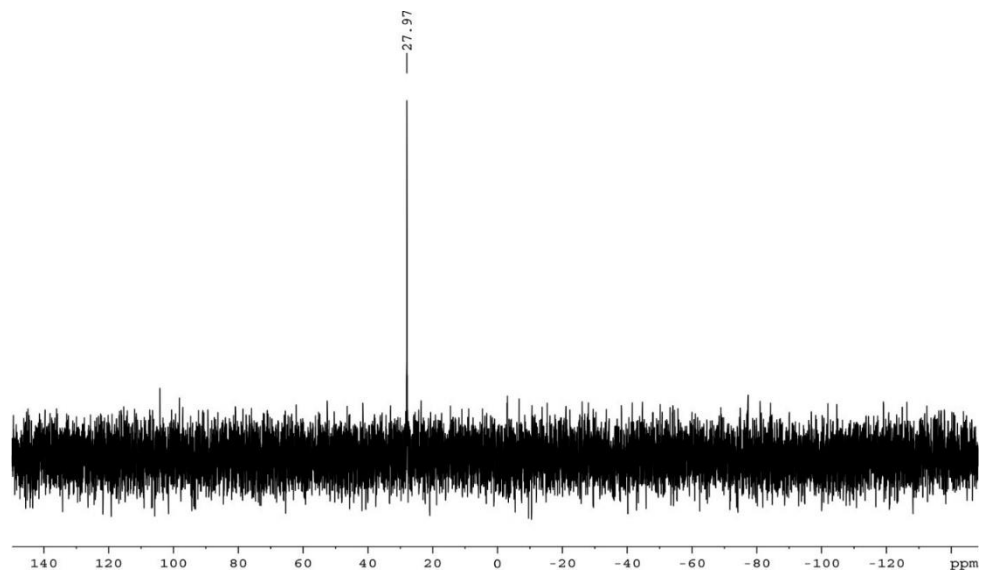

**Figure S20.**  $^{31}\text{P}\{^1\text{H}\}$  NMR spectrum (121.50 MHz) of compound 17.

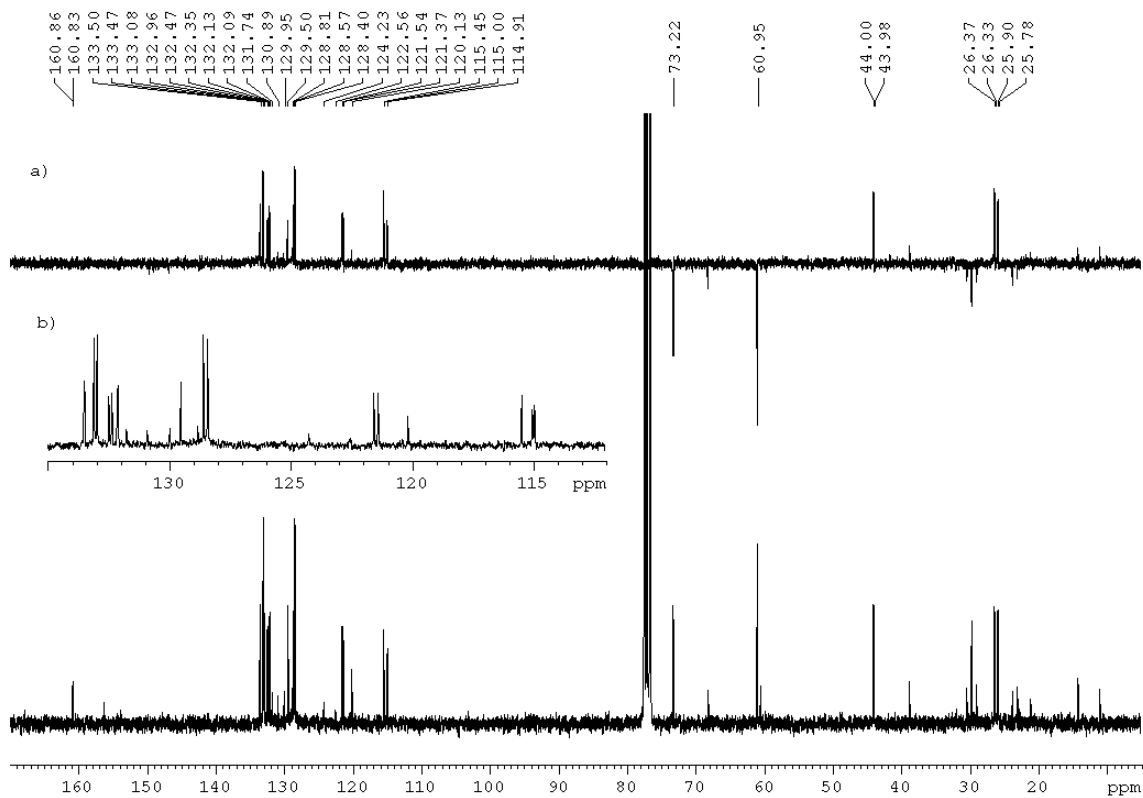

**Figure S21.** DEPT-135 (a) and  $^{13}\text{C}\{^1\text{H}\}$  (b) NMR spectra (75.47 MHz) of compound **17**.

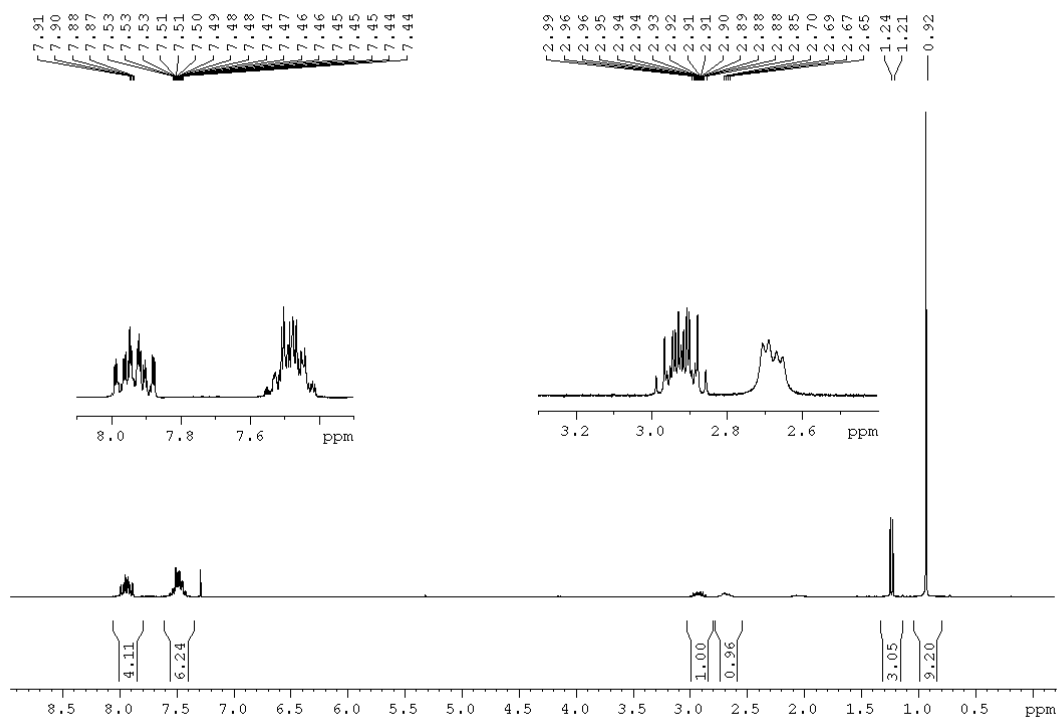

**Figure S22.**  $^1\text{H}$  (a) NMR spectrum (300.13 MHz) of compound **18**.

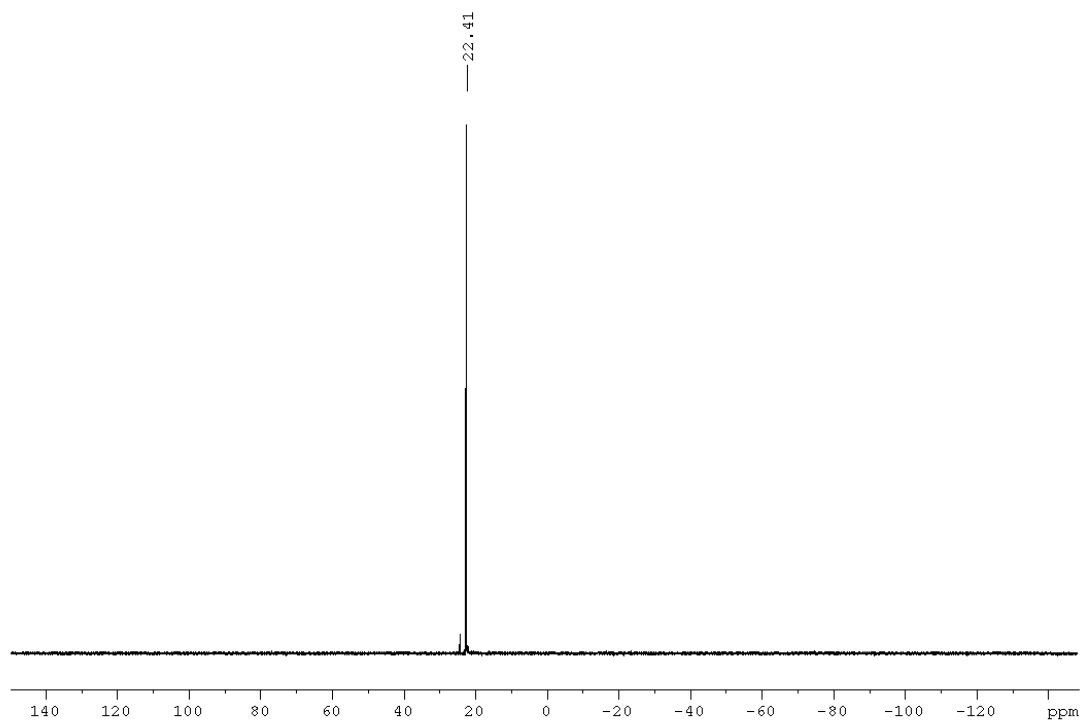

**Figure S23.**  $^{31}\text{P}\{^1\text{H}\}$  NMR spectrum (121.50 MHz) of compound **18**.

**Table S1:** Summary of the crystal structure, data collection and refinement parameters for **10** and **19**.

| Compound reference                                                                    | <b>10</b>                                                       | <b>19</b>                                                                         |
|---------------------------------------------------------------------------------------|-----------------------------------------------------------------|-----------------------------------------------------------------------------------|
| Chemical formula                                                                      | C <sub>27</sub> H <sub>41</sub> N <sub>3</sub> O <sub>2</sub> P | C <sub>44</sub> H <sub>51</sub> CuF <sub>12</sub> N <sub>3</sub> O <sub>6</sub> P |
| Formula Mass                                                                          | 470.60                                                          | 1040.40                                                                           |
| Crystal system                                                                        | Orthorhombic                                                    | Orthorhombic                                                                      |
| <i>a</i> /Å                                                                           | 8.3792(2) Å                                                     | 14.6129(3)                                                                        |
| <i>b</i> /Å                                                                           | 17.0809(4) Å                                                    | 15.1415(4)                                                                        |
| <i>c</i> /Å                                                                           | 18.6707(4) Å                                                    | 21.6411(5)                                                                        |
| $\alpha$ /°                                                                           | 90                                                              | 90                                                                                |
| $\beta$ /°                                                                            | 90                                                              | 90                                                                                |
| $\gamma$ /°                                                                           | 90                                                              | 90                                                                                |
| Unit cell volume/Å <sup>3</sup>                                                       | 2672.23(11)                                                     | 4788.34(19)                                                                       |
| Temperature/K                                                                         | 100(2)                                                          | 100(2)                                                                            |
| Space group                                                                           | <i>P</i> 2 <sub>1</sub> 2 <sub>1</sub> 2 <sub>1</sub>           | <i>P</i> 2 <sub>1</sub> 2 <sub>1</sub> 2 <sub>1</sub>                             |
| No. of formula units per unit cell, <i>Z</i>                                          | 4                                                               | 4                                                                                 |
| Radiation type                                                                        | CuK $\alpha$                                                    | CuK $\alpha$                                                                      |
| Absorption coefficient, $\mu$ /mm <sup>-1</sup>                                       | 1.12                                                            | 1.81                                                                              |
| No. of reflections measured                                                           | 13459                                                           | 25077                                                                             |
| No. of independent reflections                                                        | 5437                                                            | 9753                                                                              |
| <i>R</i> <sub>int</sub>                                                               | 0.037                                                           | 0.033                                                                             |
| Final <i>R</i> <sub>I</sub> values ( <i>I</i> >2 $\sigma$ ( <i>I</i> ))               | 0.030                                                           | 0.034                                                                             |
| Final <i>wR</i> ( <i>F</i> <sup>2</sup> ) values ( <i>I</i> >2 $\sigma$ ( <i>I</i> )) | 0.072                                                           | 0.081                                                                             |
| Final <i>R</i> <sub>I</sub> values (all data)                                         | 0.035                                                           | 0.040                                                                             |
| Final <i>wR</i> ( <i>F</i> <sup>2</sup> ) values (all data)                           | 0.075                                                           | 0.084                                                                             |
| Goodness of fit on <i>F</i> <sup>2</sup>                                              | 1.05                                                            | 1.03                                                                              |
| $\Delta\rho_{\max}$ and $\Delta\rho_{\min}$ , eÅ <sup>-3</sup>                        | 0.21 and -0.32                                                  | 0.46 and -0.30                                                                    |
| Flack parameter                                                                       | 0.024(9)                                                        | -0.007(9)                                                                         |
| CCDC Deposition                                                                       | 2011812                                                         | 2011813                                                                           |

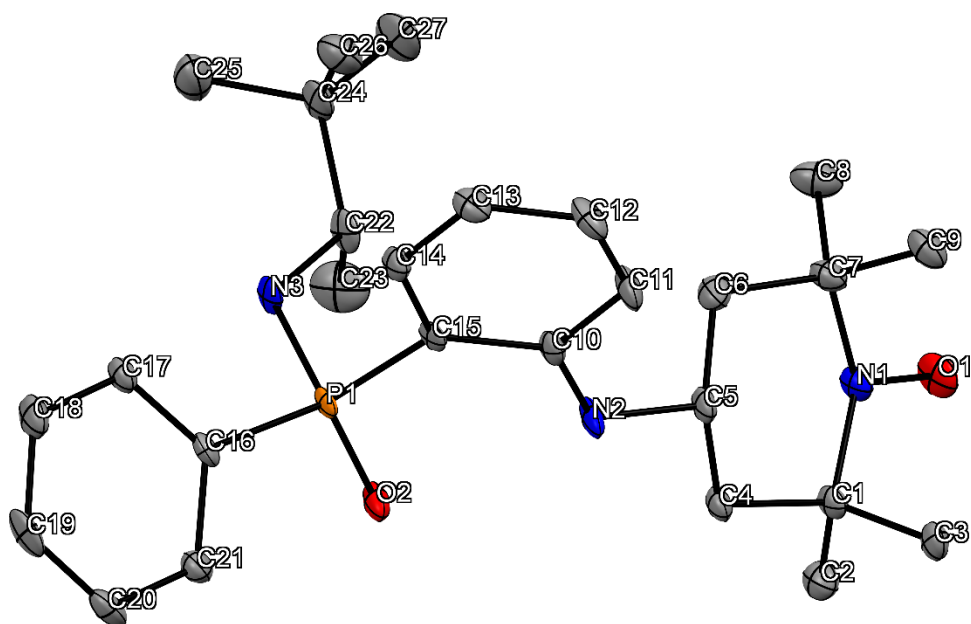

**Figure S20:** Thermal ellipsoids of the asymmetric unit of compound **10** drawn at 50% of probability level. Hydrogen atoms were omitted for clarity.

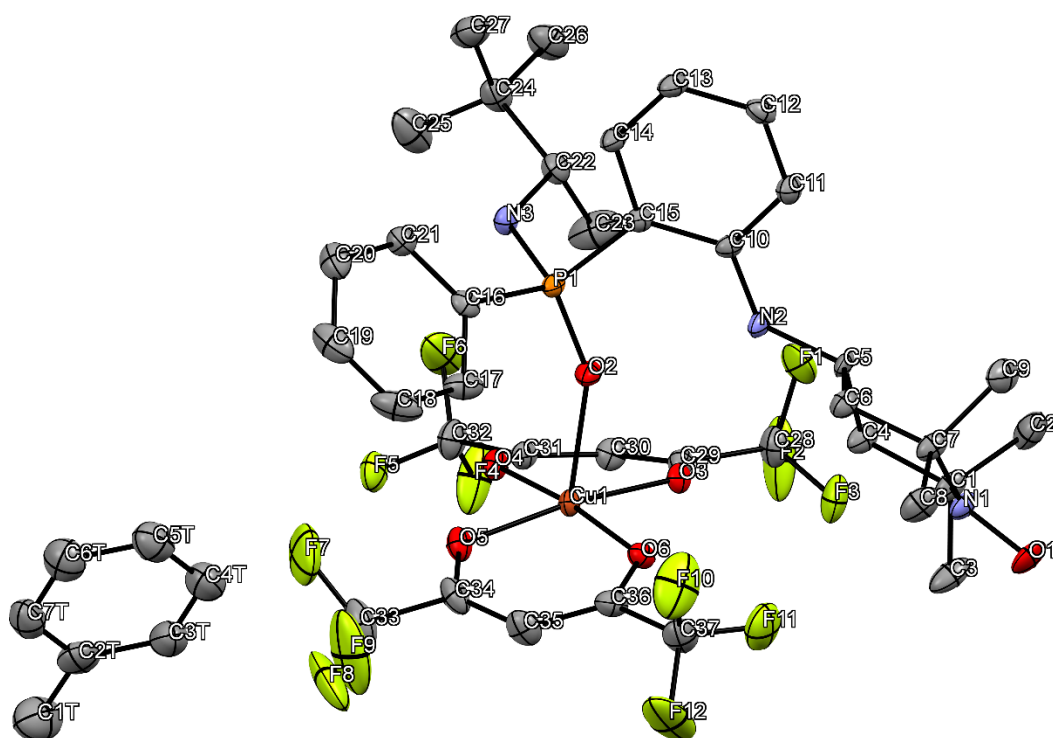

**Figure S21:** Thermal ellipsoids of the asymmetric unit of compound **19** drawn at 50% of probability level. Hydrogen atoms were omitted for clarity.
